# Supplementary material for: [Retracted] Studying the Role and Molecular Mechanisms of MAP4K3 in Sorafenib Resistance of Hepatocellular Carcinoma
Source: Hindawi journal article supplement (doi:10.1155/2020/4965670), 2020-01-01
Supplement: f1 [file 4965670.f1.docx]

**Supplementary Figures**


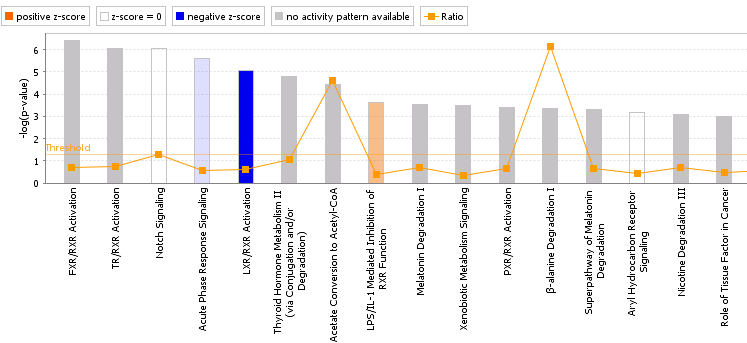


**Supplementary Figure 1.** Gene enrichment in empiric signaling pathway. All signaling pathway was arranged as –log (p-value): orange color represented as Z-score was greater than 0, blue color represented as z-score less than 0. If Z-score was greater than 2 which indicated as the pathway was significantly activated, while Z-score less than 2 which indicated the signaling pathway was significantly inhibited, respectively. Ratio was meaning the number of differential gene over the all genes in this signaling pathway. This study, activation of LXR/RXR was significantly inhibited with Z-score as -2.309. LXR (Liver X receptor, liver X) is a number of the hormone nuclear receptor superfamily. After being activated by ligand such as bile acid, it combines with heterologous dimer RXR (retinoid X receptor), thereby, to regulate the expression of downstream genes. The LXR/RXR is signaling pathway network to regulate body metabolic homeostasis by regulating glucose and lipid metabolism, especially regulated bile aid cycle, moreover, it is associated with occurrence and development of tumor. Among them, abnormal expression of low-density lipoprotein might provide a novel study direction in terms of Sorafenib resistance.

**
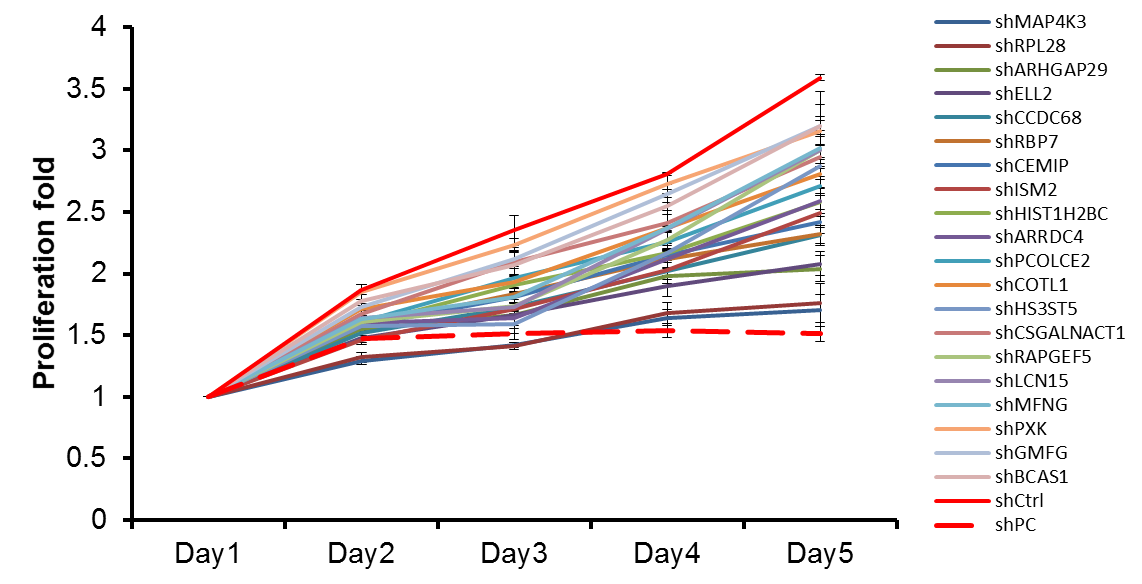
**

**Supplementary Figure 2**. The proliferation efficacy of 20 selected genes knockdown. The fold change of cell proliferation, the proliferation fold was slower in shMAP4K3 compared to shCtrl group over time.
